# Supplementary material for: Angiopoietin-Like 4 (ANGPTL4) in Patients with Psoriasis, Lichen Planus and Vitiligo—A Pilot Study from the Bialystok+ Polish Longitudinal University Study
Source: MDPI journal article supplement (doi:10.3390/metabo12090877), 2022-09-17
Supplement: s1 [file s1]

| No | Group     | ANGPTL4 concentration (ng/ml) |
|----|-----------|-------------------------------|
| 1  | control   | 6,172                         |
| 2  | control   | 0,012                         |
| 3  | control   | 0,01                          |
| 4  | control   | 0,013                         |
| 5  | control   | 0,02                          |
| 6  | control   | 0,014                         |
| 7  | control   | 1,272                         |
| 8  | control   | 0,013                         |
| 9  | control   | 6,736                         |
| 10 | control   | 0,25                          |
| 11 | control   | 1,06                          |
| 12 | control   | 0,022                         |
| 13 | control   | 49,37                         |
| 14 | control   | 0,018                         |
| 15 | control   | 0,03                          |
| 16 | control   | 0,027                         |
| 17 | control   | 0,031                         |
| 18 | control   | 1,476                         |
| 19 | control   | 0,015                         |
| 20 | control   | 0,066                         |
| 21 | control   | 0,326                         |
| 22 | control   | 49,35                         |
| 23 | control   | 0                             |
| 24 | control   | 20,261                        |
| 25 | control   | 20,283                        |
| 26 | control   | 0,039                         |
| 27 | control   | 0,027                         |
| 28 | control   | 1,61                          |
| 29 | control   | 37,144                        |
| 30 | vitiligo  | 0,012                         |
| 31 | vitiligo  | 0,019                         |
| 32 | vitiligo  | 0,892                         |
| 33 | vitiligo  | 0,022                         |
| 34 | vitiligo  | 0,017                         |
| 35 | vitiligo  | 0,023                         |
| 36 | vitiligo  | 0,04                          |
| 37 | vitiligo  | 0,132                         |
| 38 | vitiligo  | 0,17                          |
| 39 | vitiligo  | 0,018                         |
| 40 | vitiligo  | 8,688                         |
| 41 | vitiligo  | 0,01                          |
| 42 | vitiligo  | 15,076                        |
| 43 | vitiligo  | 0,16                          |
| 44 | vitiligo  | 17,532                        |
| 45 | vitiligo  | 7,849                         |
| 46 | vitiligo  | 0,014                         |
| 47 | vitiligo  | 91,074                        |
| 48 | psoriasis | 0,017                         |

|    |               |         |
|----|---------------|---------|
| 49 | psoriasis     | 0,016   |
| 50 | psoriasis     | 15,49   |
| 51 | psoriasis     | 0,024   |
| 52 | psoriasis     | 0,012   |
| 53 | psoriasis     | 1,432   |
| 54 | psoriasis     | 1,054   |
| 55 | psoriasis     | 0,65    |
| 56 | psoriasis     | 4,28    |
| 57 | psoriasis     | 0,037   |
| 58 | psoriasis     | 0,022   |
| 59 | psoriasis     | 0,019   |
| 60 | psoriasis     | 2,572   |
| 61 | psoriasis     | 0,022   |
| 62 | psoriasis     | 0,021   |
| 63 | psoriasis     | 0,476   |
| 64 | psoriasis     | 1,394   |
| 65 | psoriasis     | 0,612   |
| 66 | psoriasis     | 0,025   |
| 67 | psoriasis     | 0,023   |
| 68 | psoriasis     | 0,017   |
| 69 | psoriasis     | 0,019   |
| 70 | psoriasis     | 0,016   |
| 71 | lichen planus | 104,922 |
| 72 | lichen planus | 0,024   |
| 73 | lichen planus | 0,033   |
| 74 | lichen planus | 10,6    |
| 75 | lichen planus | 6,178   |
| 76 | lichen planus | 1,748   |
| 77 | lichen planus | 11,888  |
| 78 | lichen planus | 18,738  |
| 79 | lichen planus | 35,632  |
| 80 | lichen planus | 19,688  |
| 81 | lichen planus | 0,83    |
| 82 | lichen planus | 3,93    |
| 83 | lichen planus | 104,922 |
| 84 | lichen planus | 18,25   |
| 85 | lichen planus | 26,69   |
